# Supplementary material
Source: Royal Society of Chemistry journal article supplement (doi:10.1039/d6tb00140h)
Supplement: d6tb00140h1.pdf [file d6tb00140h1.pdf]

## **An Injectable Metal-Phenolic Network Hydrogel for Coordinated PRP Delivery in Osteoarthritis Treatment**

Jing Shi<sup>2†</sup>, Tao Wang<sup>3†</sup>, Mengyuan Dai<sup>4†</sup>, Qinling Liu<sup>5</sup>, Qingxin Fan<sup>6</sup>, Lu Li<sup>2</sup>, Sha Wan<sup>2</sup>, Chen Fan<sup>2</sup>, Yu Wang<sup>1\*</sup>, Qingquan Kong<sup>1\*</sup>

1. Department of Orthopedic Surgery and Orthopedic Research Institute, West China Hospital, Sichuan University, Chengdu, Sichuan, China.
2. Science and Education Section, Hospital of Chengdu Office of People's Government of Xizang Autonomous Region (Hospital.C.X.), Chengdu, Sichuan, China
3. Medical college, University of Electronic Science and Technology of China, Chengdu, Sichuan, China
4. National Clinical Research Center for Geriatrics, Center for Immunology and Hematology and General Practice Ward/International Medical Center Ward, General Practice Medical Center, State Key Laboratory of Biotherapy, West China Hospital, Sichuan University, Chengdu, China.
5. Tea Refining and Innovation Key Laboratory of Sichuan Province, College of Horticulture Sichuan Agricultural University, Chengdu, Sichuan, China
6. Department of Orthopedics, Sichuan Provincial People's Hospital, Chengdu, China.

† Jing Shi, Tao Wang and Mengyuan Dai contributed equally to this work.

\*Corresponding author. E-mail:wangyu2019@wchscu.cn, kongqingquan@163.com

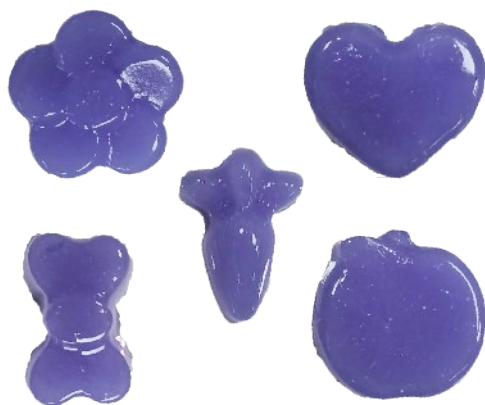

Figure SI 1. Plasticity properties of SM@PRP.

Table SI 1. Analysis of binding strength between MPN and various growth factors

| Protein      | Binding energy (kcal/mol) | Predicted Ki                   |
|--------------|---------------------------|--------------------------------|
| EGF          | -7.721                    | $2.16 \times 10^{-6} \text{M}$ |
| IGF-1        | -10.116                   | $3.77 \times 10^{-8} \text{M}$ |
| PDGF         | -8.678                    | $4.28 \times 10^{-7} \text{M}$ |
| TGF- $\beta$ | -8.770                    | $3.67 \times 10^{-7} \text{M}$ |
| VEGF         | -8.135                    | $1.07 \times 10^{-6} \text{M}$ |

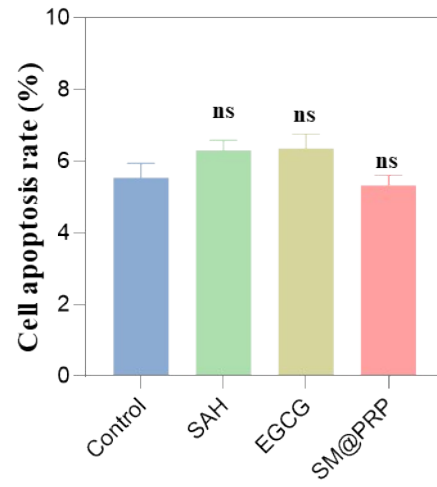

Figure SI 2. Statistical results of the apoptosis rate.

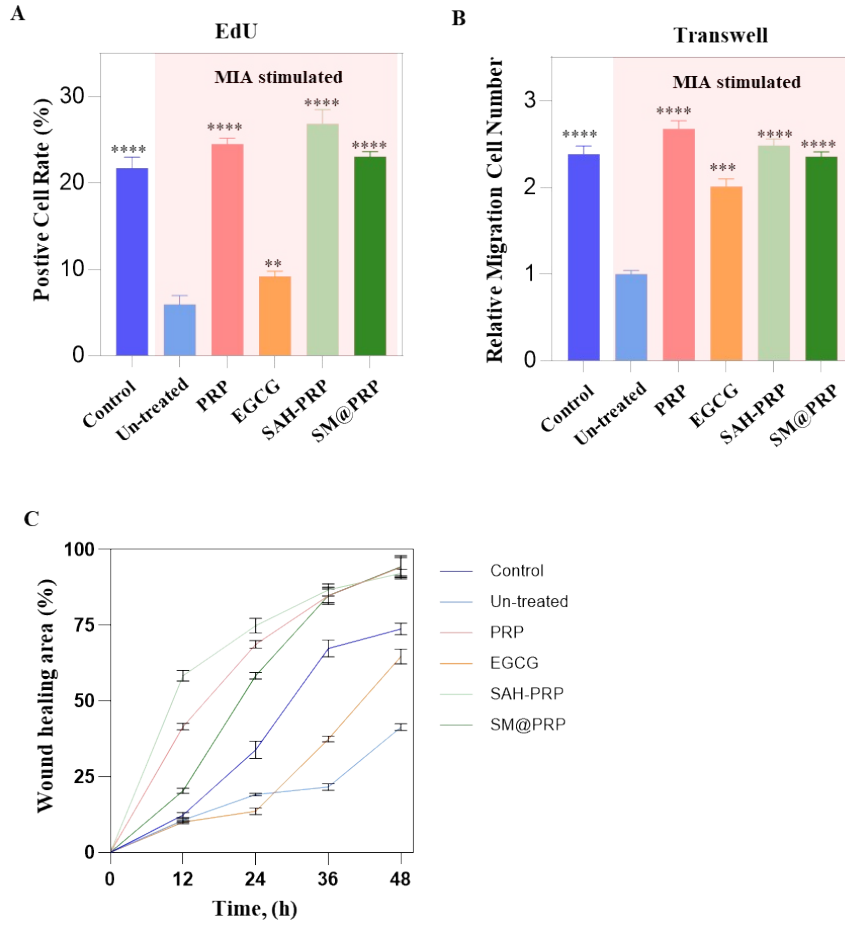

Figure SI 3. Statistical results of the EdU (A), Trans-well (B), and wound healing assays (C).  
 \*\*:  $p < 0.01$ , \*\*\*:  $p < 0.001$ , \*\*\*\*:  $p < 0.0001$

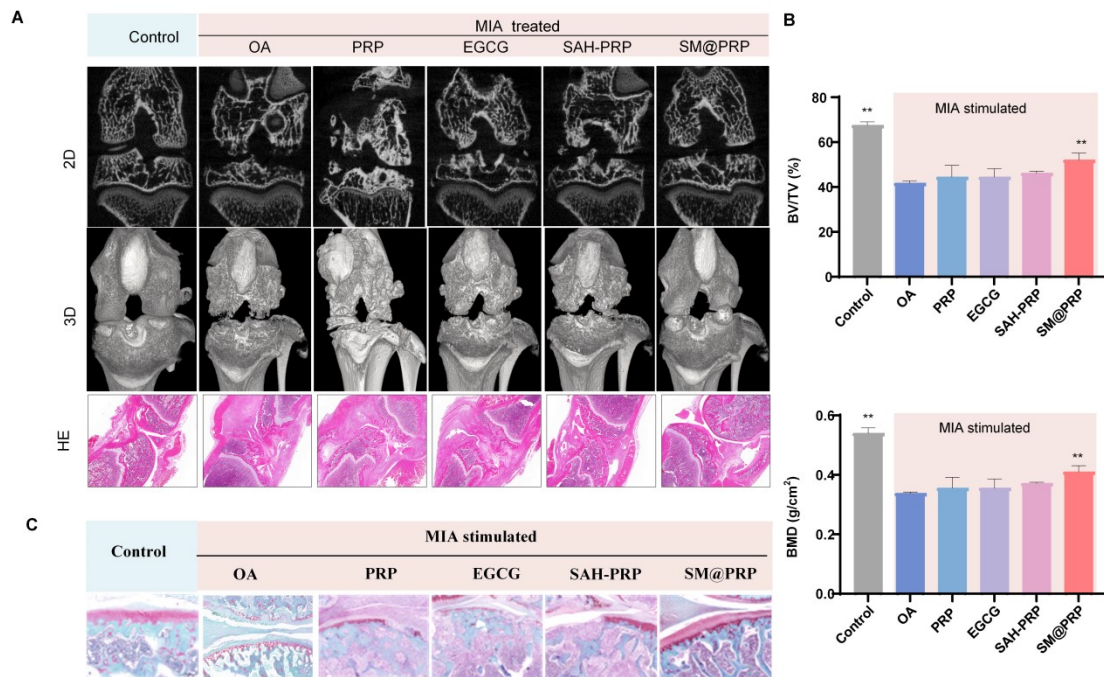

Figure SI 4. A. Representative micro-CT scanning, reconstructed images and HE of the rat knee joints at 7 days after treatment. B. Quantitative analysis of BV/TV and BMD of the rat knee joints in different groups at 7 days after treatment. C. Safranin O-Fast green of the rat knee joints at 7 days after treatment. \*\*:  $p < 0.01$

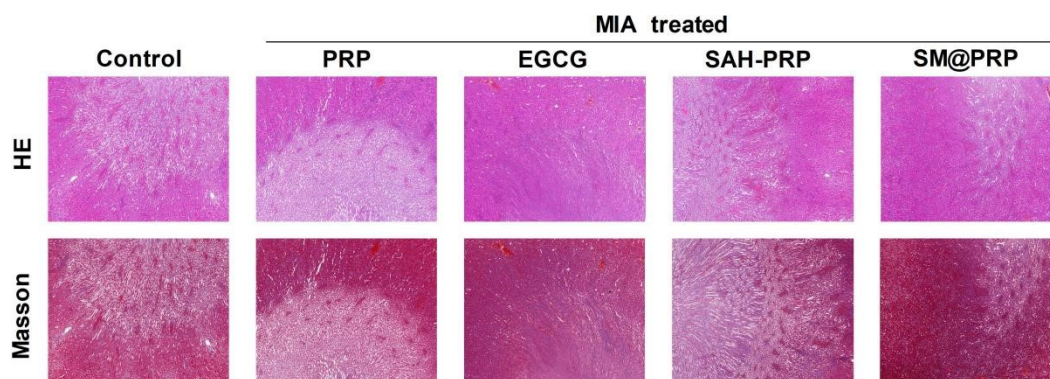

Figure SI 5. Renal toxicity 7 days after treatment in rats.

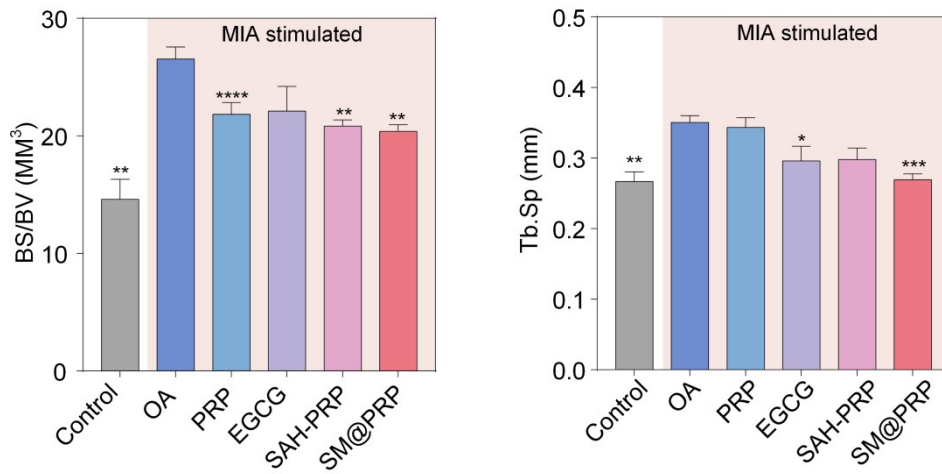

Figure SI 6. Quantitative analysis of BS/BV and Tb.Sp of the rat knee joints in different groups at 14 days after treatment. \*:  $p < 0.05$ , \*\*:  $p < 0.01$ , \*\*\*:  $p < 0.001$ , \*\*\*\*:  $p < 0.0001$
